# Supplementary material for: Re-irradiation of recurrent glioblastoma using helical TomoTherapy with simultaneous integrated boost: preliminary considerations of treatment efficacy
Source: Springer Nature journal article supplement (doi:10.1038/s41598-020-75671-9), 2020-11-09
Supplement: MOESM1 [file 41598_2020_75671_MOESM1_ESM.pdf]

## **Re-irradiation of recurrent glioblastoma using helical TomoTherapy with simultaneous integrated boost: preliminary considerations of treatment efficacy**

Donatella Arpa<sup>1,\*</sup>, Elisabetta Parisi<sup>1</sup>, Giulia Ghigi<sup>1</sup>, Alessandro Savini<sup>2</sup>, Sarah Pia Colangione<sup>1</sup>, Luca Tontini<sup>1</sup>, Martina Pieri<sup>1</sup>, Flavia Foca<sup>3</sup>, Rolando Polico<sup>1</sup>, Anna Tesei<sup>4</sup>, Anna Sarnelli<sup>2</sup> & Antonino Romeo<sup>1</sup>

<sup>1</sup>Radiotherapy Unit, Istituto Scientifico Romagnolo per lo Studio e la Cura dei Tumori (IRST) IRCCS, Meldola, Italy. <sup>2</sup>Medical Physics Unit, Istituto Scientifico Romagnolo per lo Studio e la Cura dei Tumori (IRST) IRCCS, Meldola, Italy. <sup>3</sup>Unit of Biostatistics and Clinical Trials, Istituto Scientifico Romagnolo per lo Studio e la Cura dei Tumori (IRST) IRCCS, Meldola, Italy. <sup>4</sup>Biosciences Laboratory, Istituto Scientifico Romagnolo per lo Studio e la Cura dei Tumori (IRST) IRCCS, Meldola, Italy

**Supplementary Table S1.** Detailed patient characteristics

| Surgery at initial diagnosis | MGMT methylation status | Adjuvant treatment | Adjuvant TMZ | Salvage treatment before HT-SIB | Interval between first RT and HT-SIB (months) | Therapy at PD after HT-SIB | PFS after HT-SIB (months) | OS after HT-SIB (months) | OS after initial diagnosis (months) |
|------------------------------|-------------------------|--------------------|--------------|---------------------------------|-----------------------------------------------|----------------------------|---------------------------|--------------------------|-------------------------------------|
| GTR                          | Unknown                 | RT/TMZ             | TMZ          | Re-surgery                      | 17                                            | Fotemustine                | 6                         | 8                        | 26                                  |
| GTR                          | Unknown                 | RT/TMZ             | -            | Re-surgery                      | 44                                            | Unknown                    | 20                        | 88.5                     | 135                                 |
| GTR                          | Unmethylated            | RT/TMZ             | -            | Re-surgery                      | 10                                            | BSC                        | 2                         | 7                        | 27                                  |
| STR                          | Unmethylated            | RT/TMZ             | TMZ          | -                               | 9                                             | BSC                        | 7                         | 7                        | 19                                  |
| STR                          | Unmethylated            | RT/TMZ             | TMZ          | -                               | 4                                             | Fotemustine                | 2                         | 4                        | 11                                  |
| STR                          | Unknown                 | RT/TMZ             | TMZ          | -                               | 29                                            | BSC                        | 1.6                       | 1.6                      | 32                                  |
| STR                          | Methylated              | RT/TMZ             | TMZ          | Re-surgery                      | 33                                            | Second Re-RT               | 6                         | 13                       | 47                                  |
| GTR                          | Methylated              | RT/TMZ             | TMZ          | -                               | 13                                            | BSC                        | 4                         | 4                        | 20                                  |
| BIOPSY                       | Methylated              | RT/TMZ             | TMZ          | Fotemustine                     | 34                                            | Rechallenge TMZ            | 2                         | 10                       | 44                                  |
| STR                          | Unmethylated            | RT/TMZ             | TMZ          | Bevacizumab                     | 9                                             | BSC                        | 2                         | 11                       | 23                                  |
| STR                          | Methylated              | RT/TMZ             | TMZ          | Re-surgery                      | 13                                            | BSC                        | 2                         | 4                        | 19                                  |
| STR                          | Unmethylated            | RT/TMZ             | TMZ          | Re-surgery                      | 31                                            | Etoposide+ carboplatin     | 4                         | 16                       | 48                                  |
| GTR                          | Unmethylated            | RT/TMZ             | TMZ          | Re-Surgery                      | 8                                             | Fotemustine                | 6                         | 7                        | 18                                  |
| GTR                          | Methylated              | RT/TMZ             | TMZ          | Bevacizumab                     | 35                                            | BSC                        | 2                         | 4                        | 25                                  |
| GTR                          | Methylated              | RT/TMZ             | TMZ          | -                               | 60                                            | Re-surgery followed by TMZ | 24                        | 36                       | 98                                  |
| GTR                          | Unmethylated            | RT/TMZ             | TMZ          | Fotemustine                     | 13                                            | PCV                        | 6                         | 9                        | 25                                  |
| GTR                          | Methylated              | RT/TMZ             | TMZ          | -                               | 33                                            | TMZ                        | 8                         | 11                       | 47                                  |
| GTR                          | Methylated              | RT/TMZ             | TMZ          | -                               | 11                                            | Bevacizumab                | 4                         | 7                        | 22                                  |
| GTR                          | Methylated              | RT/TMZ             | TMZ          | -                               | 9                                             | PCV                        | 4                         | 28                       | 40                                  |
| GTR                          | Unknown                 | RT/TMZ             | TMZ          | -                               | 65                                            | Unknown                    | 10                        | 14                       | 81                                  |
| STR                          | Unmethylated            | RT/TMZ             | TMZ          | Fotemustine                     | 41                                            | Bevacizumab                | 2                         | 7                        | 50                                  |
| GTR                          | Methylated              | RT/TMZ             | TMZ          | Re-surgery                      | 46                                            | Fotemustine                | 2                         | 8                        | 58                                  |
| STR                          | Unknown                 | RT/TMZ             | TMZ          | Re-surgery                      | 19                                            | Bevacizumab                | 16                        | 18                       | 40                                  |
| STR                          | Methylated              | RT/TMZ             | TMZ          | -                               | 21                                            | Bevacizumab                | 4                         | 27                       | 51                                  |

GTR: gross total resection; STR: subtotal resection; TMZ: temozolomide; BSC: best supportive care; HT-SIB: helical TomoTherapy-simultaneous integrated boost; Re-RT: re-irradiation; PCV: procarbazine, lomustine and vincristine.
